# Supplementary material for: Increased Binding of Specificity Protein 1 to the IL21R Promoter in B Cells Results in Enhanced B Cell Responses in Rheumatoid Arthritis
Source: PubMed Central journal article supplement (PMC6134023; doi:10.3389/fimmu.2018.01978), 2018-09-05
Supplement: Image_1.pdf [file Image_1.pdf]

# Supplemental Figures

Increased binding of specificity protein 1 to the *IL21R* promoter in B cells results in enhanced B cell responses in rheumatoid arthritis

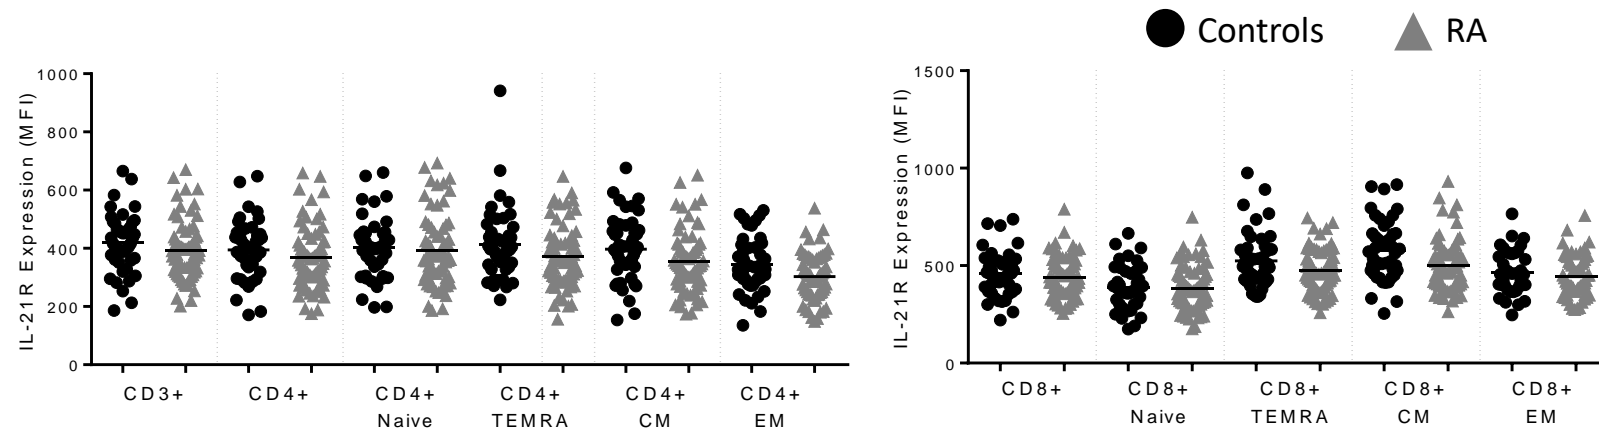

**Supplemental Figure 1: No change in IL-21 receptor expression in T cells in RA patients compared to controls. (A)** IL-21R expression was measured in CD4<sup>+</sup> (left) and CD8<sup>+</sup> (right) T cell subsets in controls compared to RA patients (●) Controls (n = 46) and (▲) RA (n = 71). After gating CD3<sup>+</sup> cells, CD4<sup>+</sup> and CD8<sup>+</sup> cells were positively gated followed by naïve (CD45RA<sup>+</sup>CD27<sup>+</sup>), TEMRA (CD45RA<sup>+</sup>CD27<sup>-</sup>), central memory (CM, CD45RO<sup>+</sup>CD27<sup>+</sup>) and effector memory (EM, CD45RO<sup>+</sup>CD27<sup>-</sup>). Significance was assessed using a Mann Whitney U test.

**A**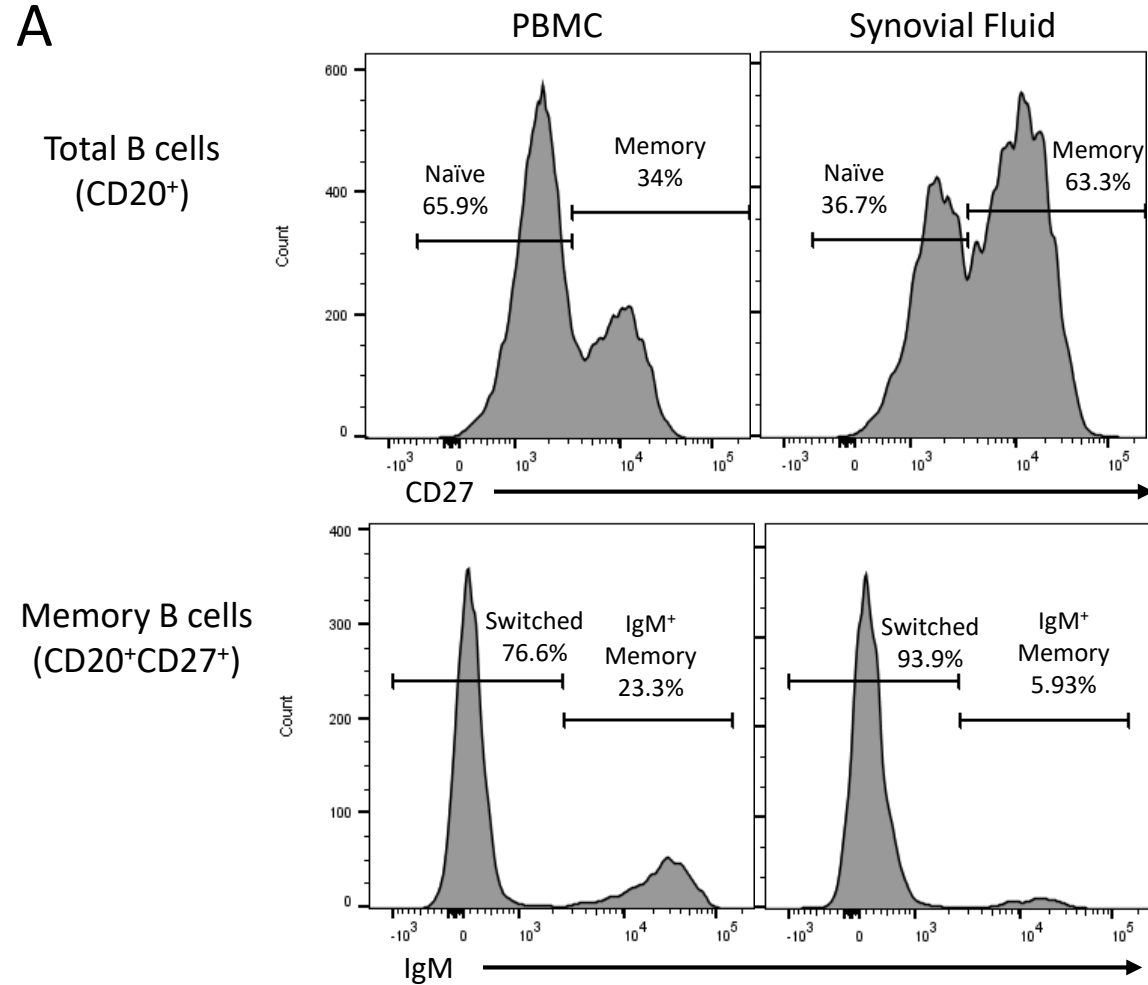**B**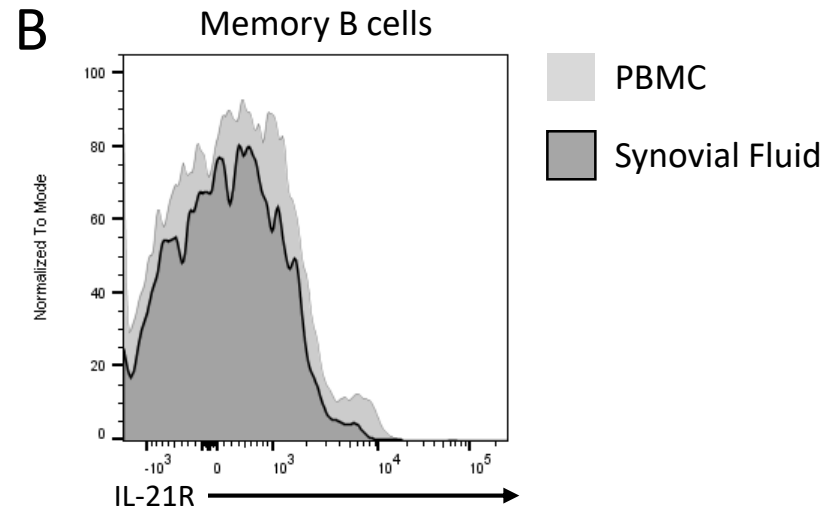**C**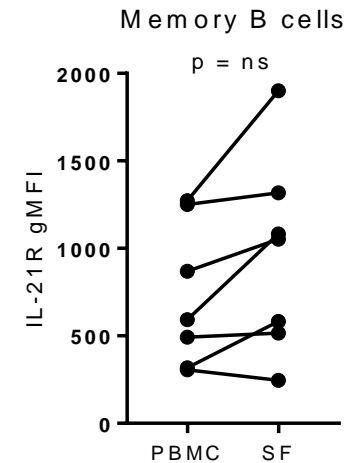

**Supplemental Figure 2: IL-21R expression in memory B cells in the synovial fluid is the equivalent to those in the periphery in RA patients.** (A) Cells from peripheral blood (PBMC) and synovial fluid were analyzed by staining for total B cells (CD20<sup>+</sup>) followed by gating for naïve (CD27<sup>-</sup>) and memory (CD27<sup>+</sup>) B cell subsets (top). Memory B cells were assessed for IgM<sup>+</sup> and switched memory populations (IgM<sup>-</sup>) (bottom). (B) Representative IL-21R staining of total memory B cells from PBMC and synovial fluid. (C) Comparison of IL-21R expression levels on memory B cells from PBMC and synovial fluid (SF) from the same RA subject. In C, a paired t-test was used to assess significance between PBMC and SF of the same subject (N = 7).

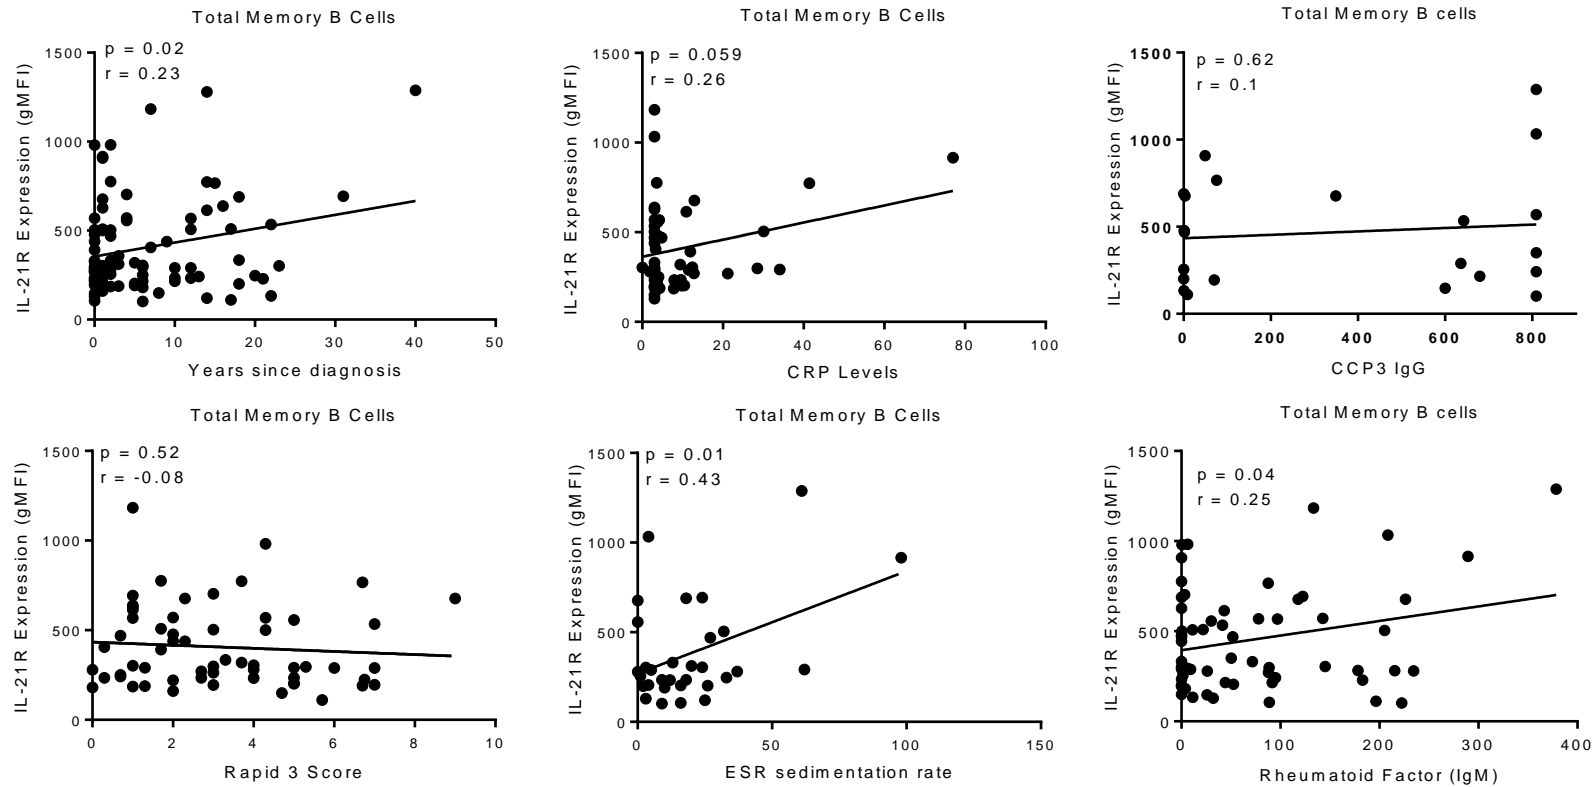

**Supplemental Figure 3: Correlation between IL-21R expression, years since diagnosis and ESR sedimentation rate.** IL-21R expression in total memory B cells obtained as described in (Figure 1A) was correlated to years since diagnosis ( $n = 96$ ) (upper left), rapid 3 score ( $n = 59$ ) (lower left), CRP levels ( $n = 50$ ) (upper middle), ESR sedimentation rate ( $n = 32$ ) (lower middle), CCP3 IgG ( $n = 22$ ) (upper right) and rheumatoid factor IgM ( $n = 62$ ) (lower right) in RA patients. Significant correlation was assessed using Pearson correlation where  $r$  is the correlation coefficient.

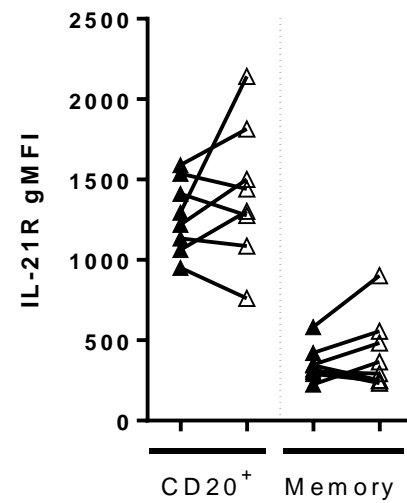

**Supplemental Figure 4: IL-12R expression is stable.** IL-12R expression was assessed in RA subjects at two time points. The two timepoints were between 2-5 years apart.

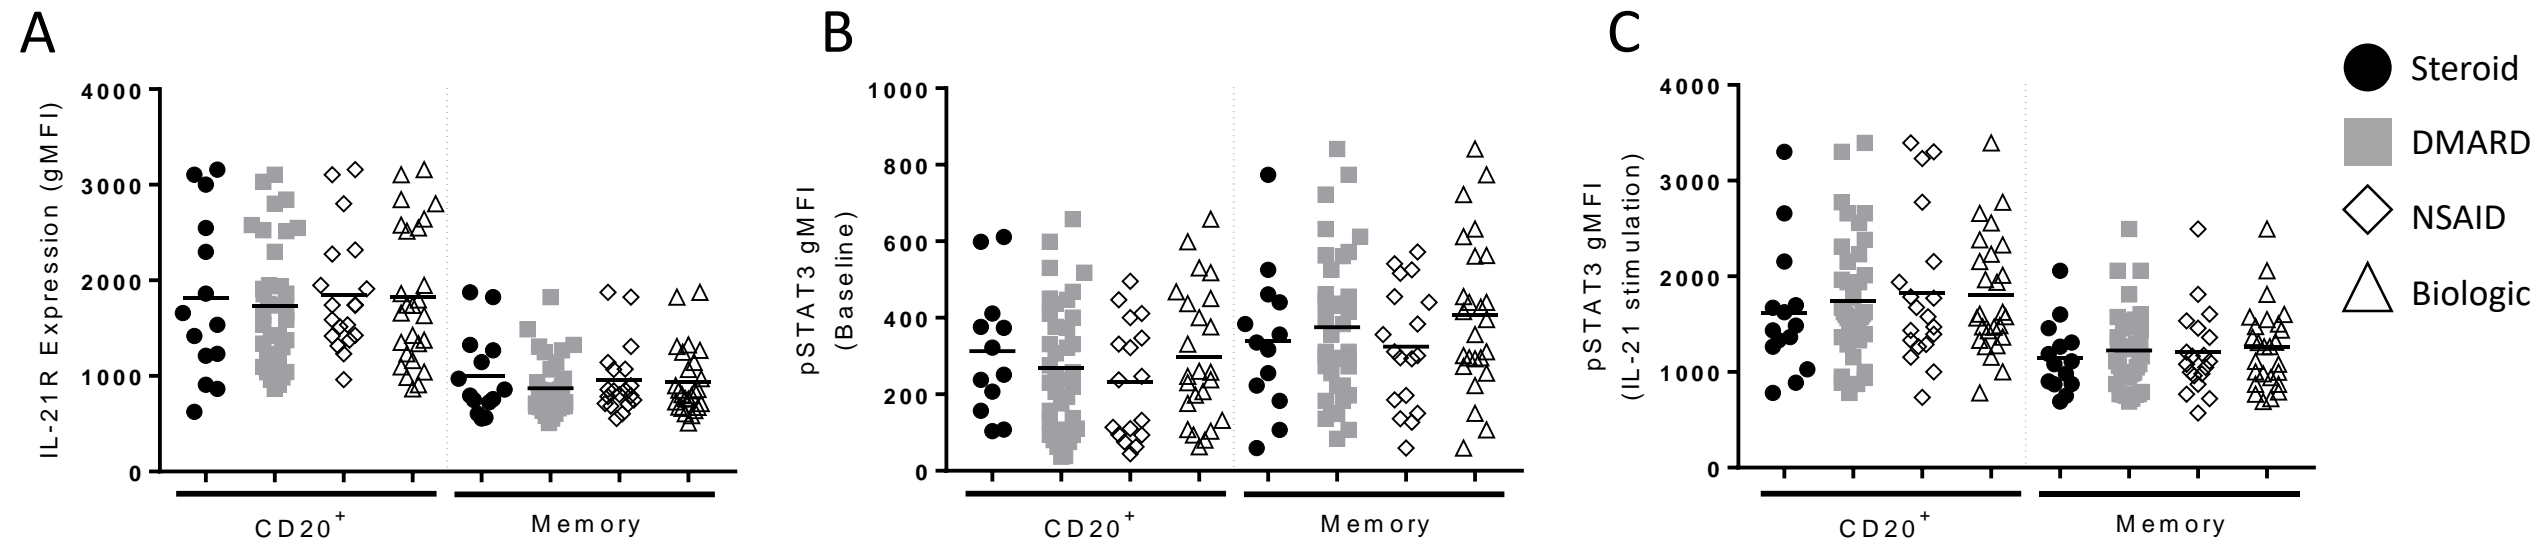

**Supplemental Figure 5: No changes in IL-21R or pSTAT3 in RA patients categorized based on therapy.** PBMC from RA patients were thawed and B cells (total and memory (CD38<sup>lo</sup>CD24<sup>hi</sup>)) were analyzed for IL-21R surface expression **(A)** pSTAT3 levels at baseline with no stimulation **(B)** pSTAT3 levels following a 45 minute IL-21 stimulation **(C)** Patients were categorized according to therapy: steroid, DMARD, NSAID and/or biologics while excluding those on rituximab.

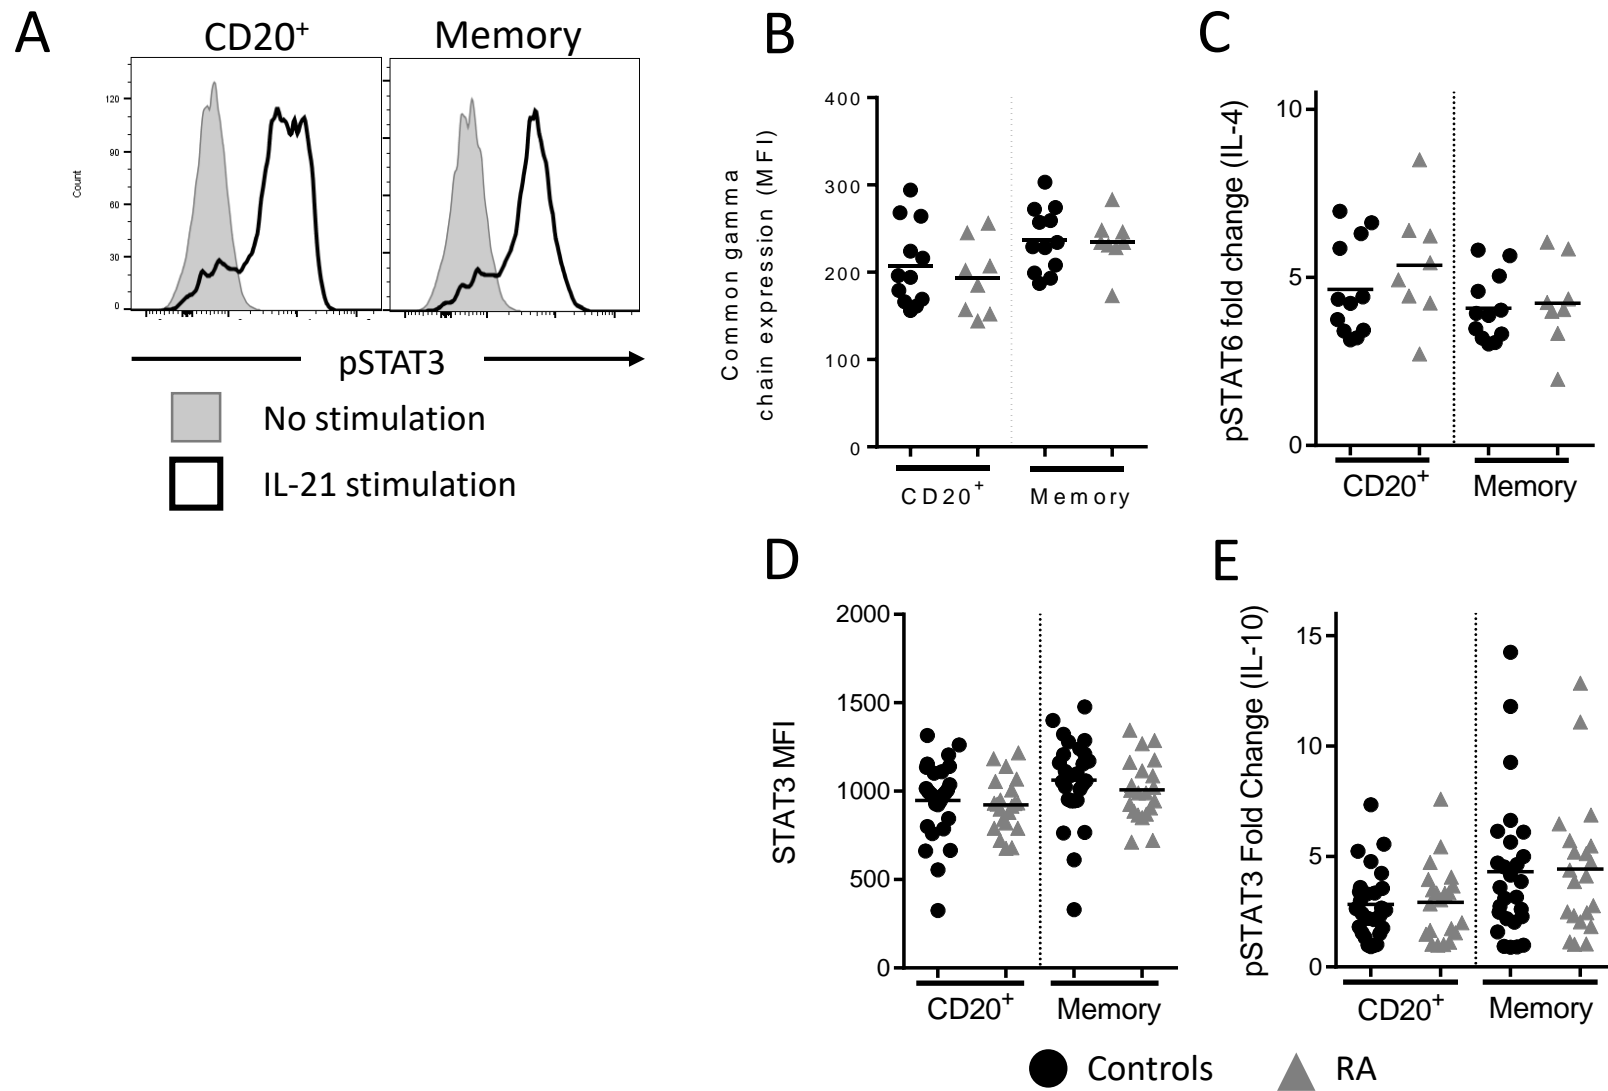

**Supplemental Figure 6: No change in common gamma chain and STAT3 expression or IL-4 and IL-10 signaling in B cells from RA patients compared to controls.** (A) Representative histograms of pSTAT3 levels with IL-21 stimulation (black line) or no stimulation (grey histogram) in CD20<sup>+</sup> and total memory B cells. (B) Baseline  $\gamma_C$  expression levels (C, n = 12; RA, n = 8), (C) pSTAT6 fold change levels after IL-4 stimulation (C, n = 12; RA, n = 8), (D) Baseline total STAT3 levels (C, n = 27; RA, n = 21) and (E) pSTAT3 fold change levels after IL-10 stimulation (C, n = 27; RA, n = 21) were determined in CD20<sup>+</sup> and total memory B cells from control and RA patients. Significance was assessed by Mann Whitney U test in (B) – (E).

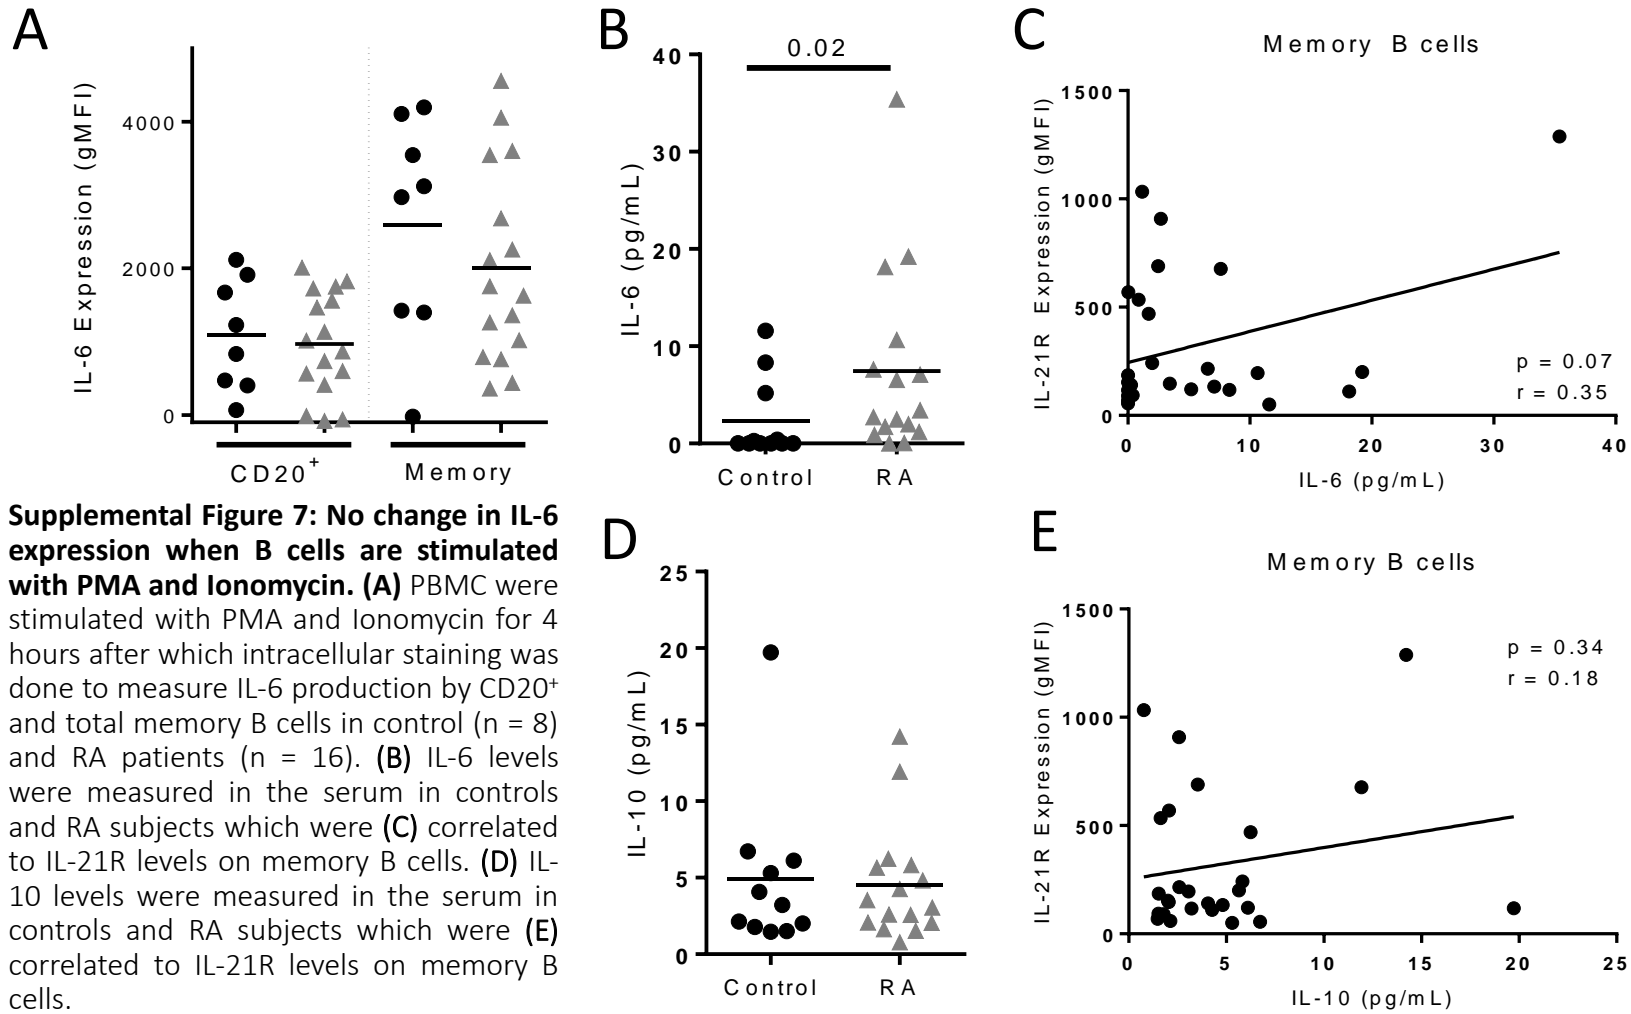

**Supplemental Figure 7: No change in IL-6 expression when B cells are stimulated with PMA and Ionomycin.** (A) PBMC were stimulated with PMA and Ionomycin for 4 hours after which intracellular staining was done to measure IL-6 production by CD20<sup>+</sup> and total memory B cells in control (n = 8) and RA patients (n = 16). (B) IL-6 levels were measured in the serum in controls and RA subjects which were (C) correlated to IL-21R levels on memory B cells. (D) IL-10 levels were measured in the serum in controls and RA subjects which were (E) correlated to IL-21R levels on memory B cells.



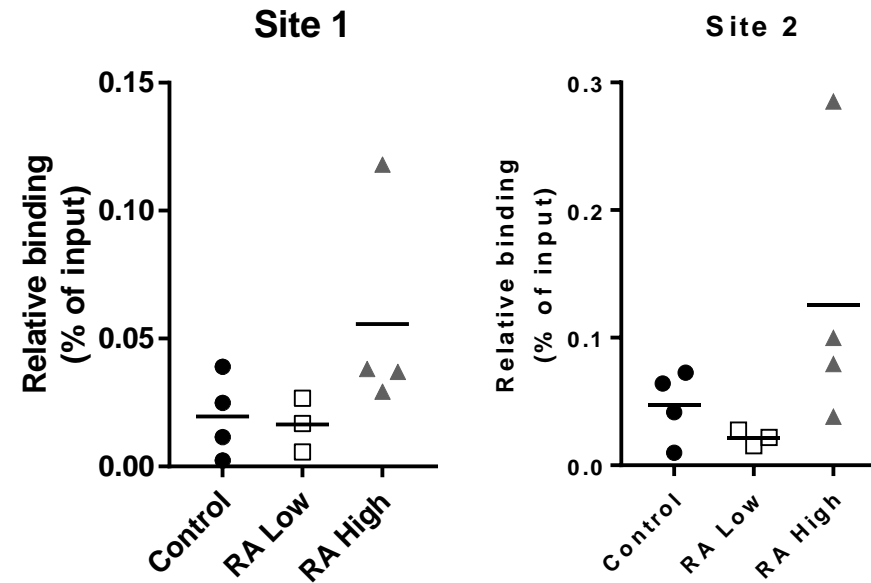

**Supplemental Figure 8. No difference in SP1 binding in regions outside the *IL21R* gene.** Total B cells were isolated from whole blood from RA patients and controls. SP1 binding to regions outside the *IL21R* gene were assessed by ChIP-qPCR analysis. The results are presented relative to input DNA (n = 4 for Ctrl, RA High) (n = 3 for RA Low).

**A**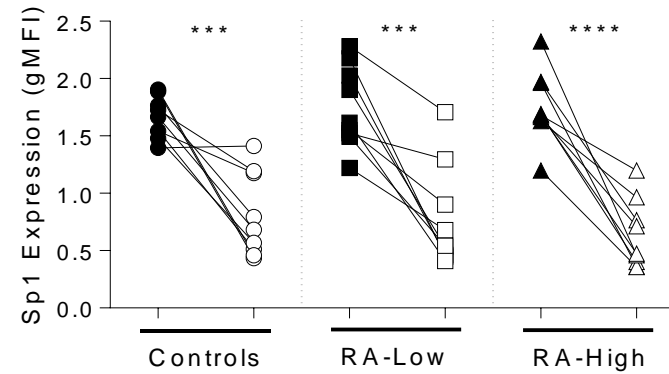**B**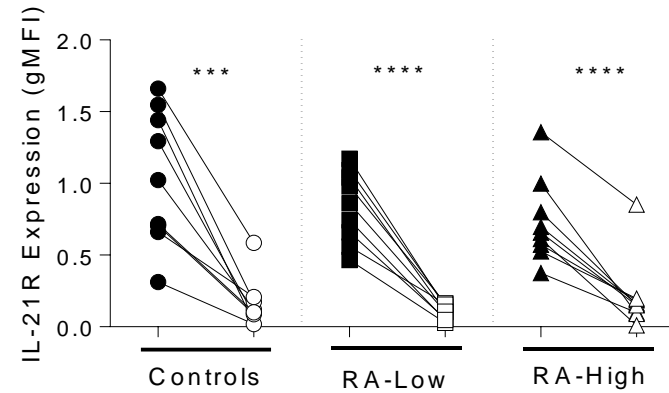

**Supplemental Figure 9: Okadaic acid decreased SP1 levels and decreases IL-21R levels after a 24 hour incubation.** Total PBMC from control and RA subjects were incubated with okadaic acid (OA) or a DMSO control for 24 hours. At 0 and 24 hours total (A) SP1 and (B) IL-21R expression levels were quantified in total B cells and normalized to the DMSO control. Analyzed by Student's paired t-test.
